# Supplementary material for: Development of singlet oxygen-responsive phosphorescent ruthenium(ii) complexes
Source: Royal Society of Chemistry journal article supplement (doi:10.1039/c3dt52020j), 2013-01-01
Supplement: c3dt52020j.pdf [file c3dt52020j.pdf]

## Electronic Supplementary Information for

### Development of singlet oxygen-responsive phosphorescent ruthenium(II) complexes

Zhiqiang Ye,\* Bo Song, Yuejiao Yin, Run Zhang, Jingli Yuan\*

State Key Laboratory of Fine Chemicals, School of Chemistry, Dalian University of Technology,  
Dalian 116024, China

\*Corresponding authors. Tel/Fax: +86-411-84986041. E-mail addresses: yezq@dlut.edu.cn (Z.Y.);  
jingliyuan@aliyun.com (J.Y.).

#### Experimental Details

**Materials and physical measurements.**  $\text{RuCl}_3 \cdot 3\text{H}_2\text{O}$  and anthracene-9-carboxaldehyde were purchased from Acros Organics (Belgium).  $\text{cis-Ru(II)(bpy)}_2\text{Cl}_2 \cdot 2\text{H}_2\text{O}$ , and the compound **1** and **2** used for the synthesis of An-bpy were synthesized according to the literature methods.<sup>S1-S3</sup> The reactive oxygen/nitrogen species (ROS/RNS) including  $^1\text{O}_2$ ,  $\text{H}_2\text{O}_2$ ,  $\text{ClO}^-$ ,  $\cdot\text{OH}$ ,  $\text{NO}$ ,  $\text{ONOO}^-$  and  $\text{O}^{2-}$  were prepared using the previous methods.<sup>S4</sup> Unless otherwise stated, all chemical materials were purchased from commercial sources and used without further purification.

$^1\text{H}$  NMR spectra were recorded on a Bruker Avance spectrometer (400 MHz). MS spectra were measured on a Q-TOF Micro MS spectrometer. Absorption spectra were measured on a Perkin-Elmer Lambda 35 UV-vis spectrometer. Elemental analysis was carried out on a Vario-EL

analyser. Phosphorescence spectra were measured on a Perkin-Elmer LS 50B luminescence spectrometer with excitation and emission slits of 10 nm.

**Syntheses of the Ru(II) Complexes.** The reaction pathway for the synthesis of  $[\text{Ru}(\text{bpy})_{3-n}(\text{An-bpy})_n](\text{PF}_6)_2$  ( $n = 1, 2, 3$ ) is shown in Scheme S1.

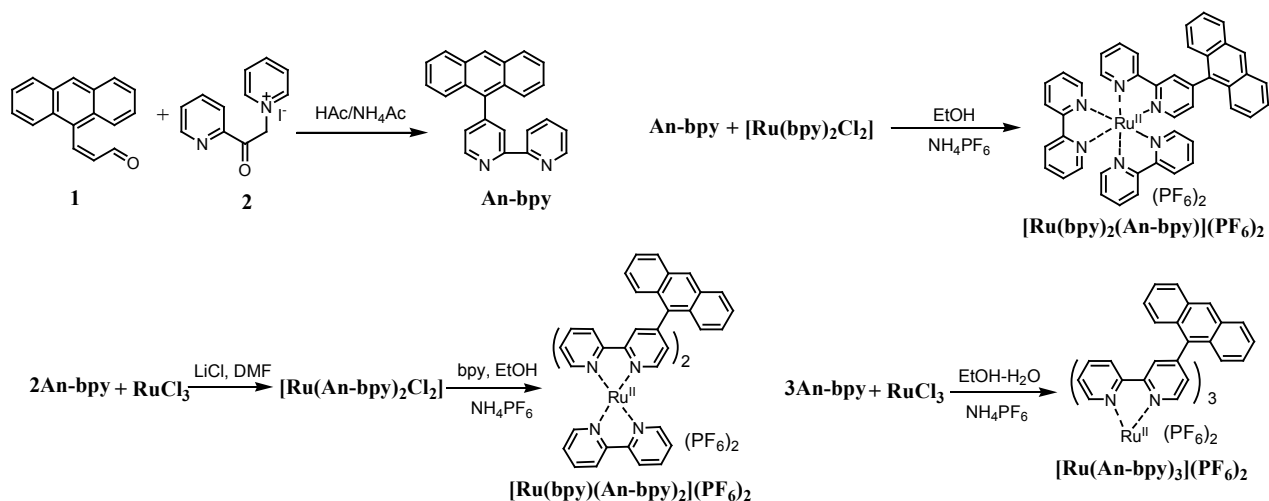

**Scheme S1.** Reaction pathway for the synthesis of  $[\text{Ru}(\text{bpy})_{3-n}(\text{An-bpy})_n](\text{PF}_6)_2$  ( $n = 1, 2, 3$ ).

The experimental details are described as follows.

**Synthesis of An-bpy.** After a solution of compound 2 (10.4 g, 30 mmol) and ammonium acetate (28 g) in 100 mL of acetic acid was refluxed for 0.5 h, compound 1 (6.0 g, 30 mmol) was slowly added within 1.5 h. The reaction mixture was refluxed for 16 h, then cooled to room temperature. The pH of the mixture was adjusted to  $\sim 7$  with 15% NaOH, and then the mixture was extracted with CH<sub>2</sub>Cl<sub>2</sub> (3  $\times$  50 mL). The organic phase was dried with Na<sub>2</sub>SO<sub>4</sub> and evaporated. After purification by silica gel column chromatography with CH<sub>2</sub>Cl<sub>2</sub>/CH<sub>3</sub>OH (100:1, v/v) as eluent, An-bpy was obtained as a brown solid (1.0 g, 10% yield). <sup>1</sup>H NMR (400 MHz, CDCl<sub>3</sub>):  $\delta = 7.41$  (m, 3H), 7.51 (m, 3H), 7.63 (d,  $J = 8.8$  Hz, 2 H), 7.94 (m, 1H), 8.09 (d,  $J = 8.4$  Hz, 2 H), 8.57 (s, 1 H), 8.61 (s, 1 H), 8.65 (d,  $J = 6.8$  Hz, 2 H), 8.96 (d,  $J = 4.8$  Hz, 1 H). MS ( $m/z$ ): 333.0 ( $[\text{M}+\text{H}]^+$ ).

**Synthesis of [Ru(bpy)<sub>2</sub>(An-bpy)](PF<sub>6</sub>)<sub>2</sub>.** A mixture of An-bpy (170 mg, 0.5 mmol) and *cis*-Ru(II)(bpy)<sub>2</sub>Cl<sub>2</sub>·2H<sub>2</sub>O (240 mg, 0.5 mmol) in 50 mL of ethanol was refluxed for 8 h. After the solvent was evaporated, the residue was purified by silica gel column chromatography using CH<sub>3</sub>CN-H<sub>2</sub>O-KNO<sub>3</sub> (sat.) (100:10:1, v/v/v) as eluent. A fraction containing the target product was collected, and the solvent was evaporated. The resulting solid was dissolved in 5.0 mL of ethanol-water (1:1), and then a solution of NH<sub>4</sub>PF<sub>6</sub> (2 mM) was added dropwise to give a red precipitate. The product was filtered, washed with small amount of water, and dried. Complex [Ru(bpy)<sub>2</sub>(An-bpy)](PF<sub>6</sub>)<sub>2</sub> was obtained (360 mg, 70% yield). <sup>1</sup>H NMR (400 MHz, CD<sub>3</sub>CN): δ = 7.37 (m, 5H), 7.48 (m, 6H), 7.77 (m, 5H), 7.89 (d, *J* = 8.0 Hz, 1 H), 7.96 (d, *J* = 8.0 Hz, 1 H), 8.02 (m, 1H), 8.09 (m, 3H), 8.18 (m, 3H), 8.45 (d, *J* = 8.0 Hz, 1 H), 8.55 (m, 4H), 8.65 (s, 1H), 8.75 (s, 1H). MS (*m/z*): 891.1 ([M-PF<sub>6</sub>]<sup>+</sup>), 373.1 ([M-2PF<sub>6</sub>]<sup>2+</sup>). Elemental analysis (%) calcd. for C<sub>44</sub>H<sub>32</sub>F<sub>12</sub>N<sub>6</sub>P<sub>2</sub>Ru: C 51.02, H 3.11, N 8.11; found: C 50.89, H 3.28, N, 8.07.

**Synthesis of [Ru(An-bpy)<sub>2</sub>Cl<sub>2</sub>].** After An-bpy (390 mg, 1.17 mmol) and LiCl (150 mg, 3.48 mmol) were added into 4 mL of DMF containing RuCl<sub>3</sub>·3H<sub>2</sub>O (120 mg, 0.58 mmol), the mixture was refluxed for 8 h under an argon atmosphere. The solution was cooled to room temperature, then 20 mL acetone was added, and the reaction mixture was stored at -20 °C overnight. The precipitate was filtered, washed with water (3 × 10 mL) and ethyl ether (2 × 10 mL), and dried. The obtained product was directly used for the synthesis of [Ru(bpy)(An-bpy)<sub>2</sub>](PF<sub>6</sub>)<sub>2</sub> without further purification.

**Synthesis of [Ru(bpy)(An-bpy)<sub>2</sub>](PF<sub>6</sub>)<sub>2</sub>.** A mixture of [Ru(An-bpy)<sub>2</sub>Cl<sub>2</sub>] (148 mg, 0.18 mmol) and bpy (27.6 mg, 0.18 mmol) in 30 mL of ethanol was refluxed for 8 h. After the solvent was evaporated, the residue was purified by silica gel column chromatography using CH<sub>3</sub>CN-H<sub>2</sub>O-KNO<sub>3</sub> (sat.) (100:10:1, v/v/v) as eluent. A fraction containing the target product was

collected, and the solvent was evaporated. The resulting solid was dissolved in 5.0 mL of ethanol-water (1:1), and then a solution of  $\text{NH}_4\text{PF}_6$  (2 mM) was added dropwise to give a red precipitate. The product was filtered, washed with small amount of water, and dried. Complex  $[\text{Ru}(\text{bpy})(\text{An-bpy})_2](\text{PF}_6)_2$  was obtained (105 mg, 60% yield).  $^1\text{H}$  NMR (400 MHz,  $\text{CD}_3\text{CN}$ ):  $\delta = 7.39$  (m, 7H), 7.53 (m, 6H), 7.61 (m, 4H), 7.88 (m, 4H), 8.01 (m, 4H), 8.15 (m, 7H), 8.46 (m, 2H), 8.61 (m, 2H), 8.73 (m, 3H), 8.77 (s, 1H). MS (m/z): 1067.1 ( $[\text{M}-\text{PF}_6]^+$ ), 461.1 ( $[\text{M}-2\text{PF}_6]^{2+}$ ). Elemental analysis (%) calcd. for  $\text{C}_{58}\text{H}_{40}\text{F}_{12}\text{N}_6\text{P}_2\text{RuH}_2\text{O}$ : C 56.64, H 3.44, N 6.83; found: C 57.01, H 3.74, N, 6.45.

**Synthesis of  $[\text{Ru}(\text{An-bpy})_3](\text{PF}_6)_2$ .** A solution of An-bpy (81 mg, 0.24 mmol) in 20 mL ethanol was added into 4 mL of water containing  $\text{RuCl}_3 \cdot 3\text{H}_2\text{O}$  (17 mg, 0.08 mmol). After the solution was refluxed for 24 h under an argon atmosphere, the solvent was evaporated, and the residue was purified by silica gel column chromatography using  $\text{CH}_3\text{CN}-\text{H}_2\text{O}-\text{KNO}_3$  (sat.) (80:10:1, v/v/v) as eluent. A fraction containing the target product was collected, and the solvent was evaporated. The resulting solid was dissolved in 5.0 mL of ethanol-water (1:1), and then a solution of  $\text{NH}_4\text{PF}_6$  (2 mM) was added dropwise to give a red precipitate. The product was filtered, washed with small amount of water, and dried. Complex  $[\text{Ru}(\text{An-bpy})_3](\text{PF}_6)_2$  was obtained (85 mg, 75% yield).  $^1\text{H}$  NMR (400 MHz,  $\text{CD}_3\text{CN}$ ):  $\delta = 7.36$  (m, 3H), 7.49 (m, 3H), 7.54 (m, 18H), 7.73 (d,  $J = 4.0$  Hz, 3H), 8.11 (m, 3H), 8.18 (m, 9H), 8.54 (m, 3H), 8.79 (d,  $J = 12.0$  Hz, 6H). MS (m/z): 1243.2 ( $[\text{M}-\text{PF}_6]^+$ ), 549.1 ( $[\text{M}-2\text{PF}_6]^{2+}$ ). Elemental analysis (%) calcd. for  $\text{C}_{72}\text{H}_{48}\text{F}_{12}\text{N}_6\text{P}_2\text{Ru}2\text{H}_2\text{O}$ : C 60.72, H 3.68, N 5.90; found: C 61.13, H 4.12, N, 5.62.

**Reaction of  $[\text{Ru}(\text{bpy})_{3-n}(\text{An-bpy})_n](\text{PF}_6)_2$  with  $^1\text{O}_2$ .** All the experiments were carried out in 0.1 M carbonate buffer of pH 10.5 using  $\text{Na}_2\text{MoO}_4-\text{H}_2\text{O}_2$  system as a  $^1\text{O}_2$  source.<sup>S4</sup> After various concentrations of  $\text{H}_2\text{O}_2$  were added into the buffer containing  $[\text{Ru}(\text{bpy})_{3-n}(\text{An-bpy})_n]^{2+}$  ( $n = 1, 2, 3$ )

(10  $\mu\text{M}$ ) and  $\text{Na}_2\text{MoO}_4$  (1.0 mM), respectively, the solutions were stirred for 3 h at room temperature, and then their phosphorescence spectra were measured on the Perkin-Elmer LS 50B luminescence spectrometer.

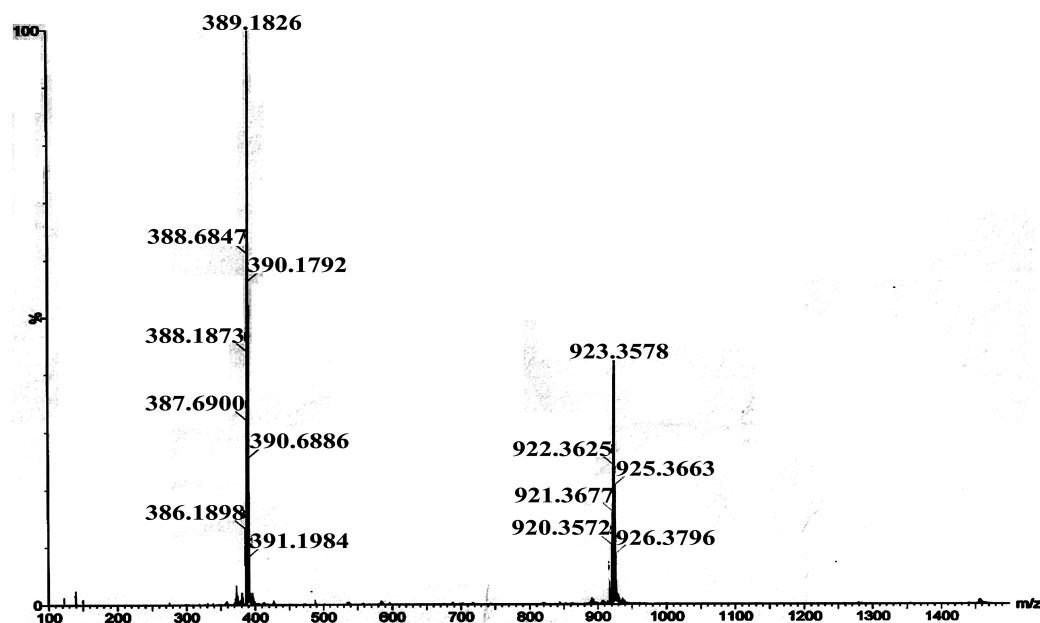

**Figure S1.** TOF-MS spectrum of the product of  $[\text{Ru}(\text{bpy})_2(\text{An-bpy})](\text{PF}_6)_2$  reacted with  $^1\text{O}_2$ .

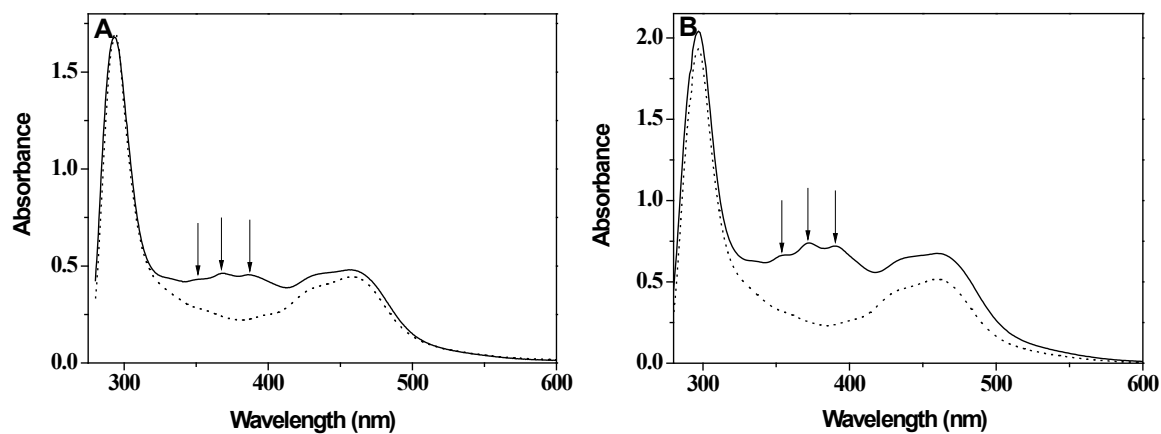

**Figure S2.** UV-vis absorption spectra of  $[\text{Ru}(\text{bpy})(\text{An-bpy})_2](\text{PF}_6)_2$  (A, solid line),  $[(\text{An-bpy})_3](\text{PF}_6)_2$  (B, solid line), and their corresponding endoperoxides (dot lines) in 0.1 M carbonate buffer of pH 10.5.

**Table S1.** Phosphorescence properties of  $[\text{Ru}(\text{bpy})_{3-n}(\text{An-bpy})_n]^{2+}$  and  $[\text{Ru}(\text{bpy})_{3-n}(\text{EP-An-bpy})_n]^{2+}$  ( $n = 1, 2, 3$ ) in 0.1 M carbonate buffer of pH 10.5.

| complex                                            | $\lambda_{\text{abs,max}}$<br>(nm) | $\lambda_{\text{em,max}}$<br>(nm) | $\phi^{\text{a}}$<br>(%) | $\epsilon_{455\text{nm}}$<br>( $\text{cm}^{-1}\text{M}^{-1}$ ) |
|----------------------------------------------------|------------------------------------|-----------------------------------|--------------------------|----------------------------------------------------------------|
| $[\text{Ru}(\text{bpy})_2(\text{An-bpy})]^{2+}$    | 455                                | 627                               | 0.31                     | $1.44 \times 10^4$                                             |
| $[\text{Ru}(\text{bpy})_2(\text{EP-An-bpy})]^{2+}$ | 455                                | 627                               | 2.30                     | $1.32 \times 10^4$                                             |
| $[\text{Ru}(\text{bpy})(\text{An-bpy})_2]^{2+}$    | 455                                | 615                               | 0.11                     | $1.51 \times 10^4$                                             |
| $[\text{Ru}(\text{bpy})(\text{EP-An-bpy})_2]^{2+}$ | 455                                | 615                               | 1.40                     | $1.32 \times 10^4$                                             |
| $[\text{Ru}(\text{An-bpy})_3]^{2+}$                | 455                                | 615                               | 0.06                     | $2.04 \times 10^4$                                             |
| $[\text{Ru}(\text{EP-An-bpy})_3]^{2+}$             | 455                                | 615                               | 1.70                     | $1.55 \times 10^4$                                             |

<sup>a</sup>Phosphorescence quantum yield was measured by using  $[\text{Ru}(\text{bpy})_3]\text{Cl}_2$  ( $\phi = 2.8\%$ ) as a standard.<sup>S5</sup>

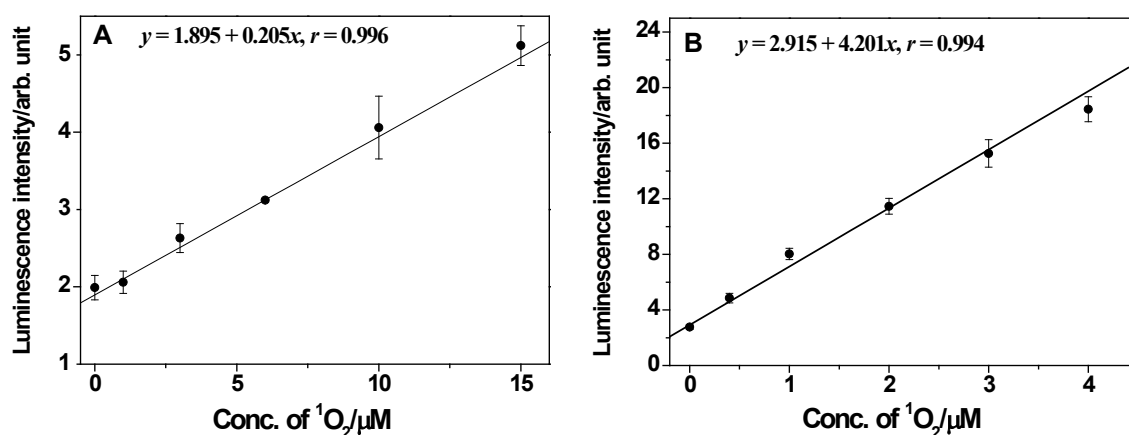

**Figure S3.** Calibration curves for the phosphorescence detection of  $^1\text{O}_2$  by using  $[\text{Ru}(\text{bpy})(\text{An-bpy})_2](\text{PF}_6)_2$  (A, 5.0  $\mu\text{M}$ ) and  $[(\text{An-bpy})_3](\text{PF}_6)_2$  (B, 5.0  $\mu\text{M}$ ) as probes, respectively.

## References

- (S1) M. E. Marmion and K. J. Takeuchi, *J. Am. Chem. Soc.* 1988, **110**, 1472.  
 (S2) L. A. MacManus-Spencer, D. E. Latch, K. M. Kroncke and K. McNeill, *Anal. Chem.*, 2005, **77**, 1200.

(S3) B. P. Sullivan, D. J. Salon and T. J. Meyer, *Inorg. Chem.*, 1978, **17**, 3334.

(S4) (a) B. Song, G. L. Wang and J. L. Yuan, *Chem. Commun.*, 2005, 3553; (b) B. Song, G. L. Wang, M. Q. Tan and J. L. Yuan, *New J. Chem.*, 2005, **29**, 1431; (c) B. Song, G. L. Wang, M. Q. Tan and J. L. Yuan, *J. Am. Chem. Soc.*, 2006, **128**, 13442.

(S5) A. Juris and V. Balzani, *Coord. Chem. Rev.* 1988, **84**, 85.
